# Supplementary material
Source: PubMed Central journal article supplement (PMC4198049)
Supplement: embj0033-1514-sd1.pdf [file embj0033-1514-sd1.pdf]

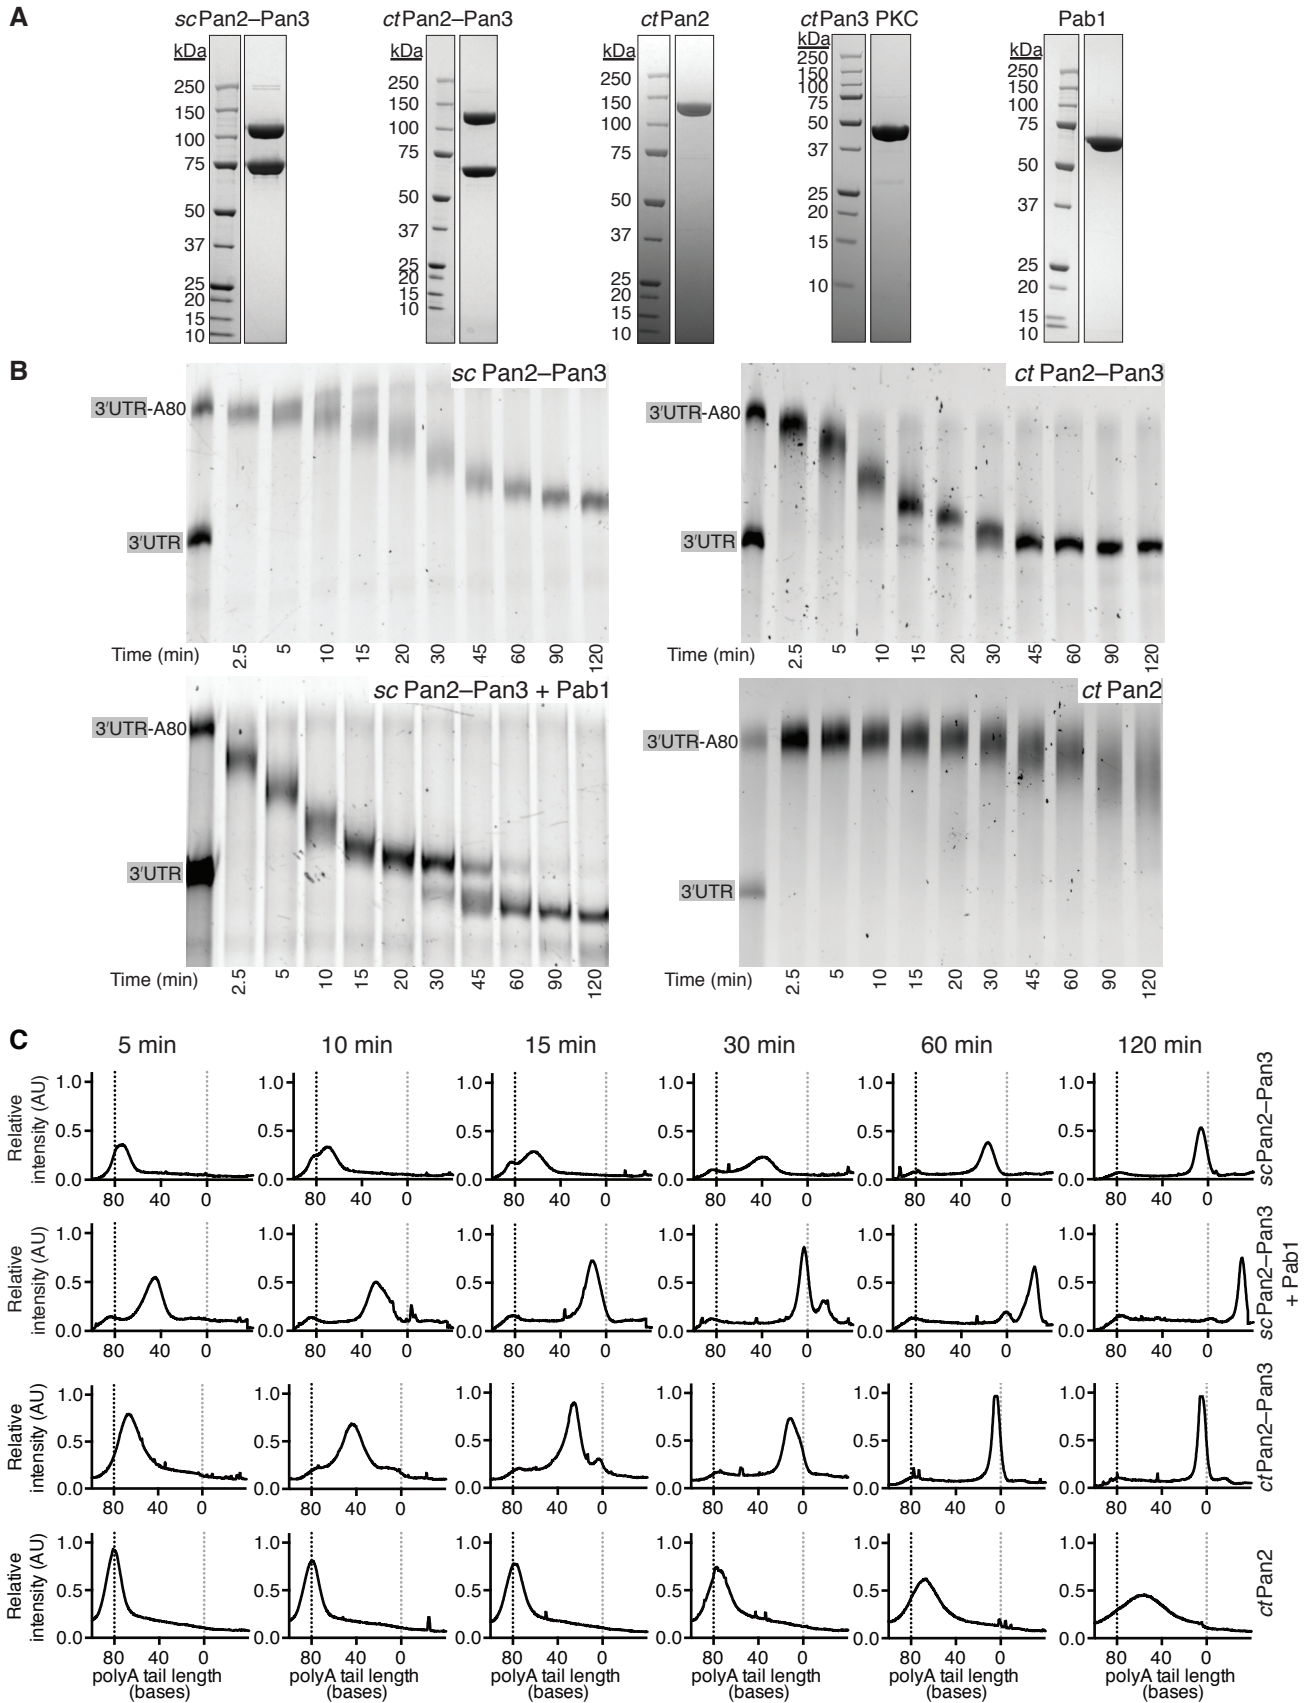

**Supplementary Figure S1: Deadenylation activity of the Pan2–Pan3 complex does not require PABP/Pab1**

**A** Coomassie-blue stained SDS-polyacrylamide gels of recombinant purified proteins.

**B-C** Deadenylation assays of an RNA substrate (*CYC1* 3' UTR with A<sub>80</sub> tail) by recombinant Pan2–Pan3 from *S. cerevisiae* (*sc*) in the presence and absence of Pab1, Pan2–Pan3 from *C. thermophilum* (*ct*) and isolated *ctPan2*. Time points were analyzed by denaturing polyacrylamide gel electrophoresis, shown in (B). The first lane shows *CYC1* 3' UTR with and without A<sub>80</sub> tail as a marker. Lane intensities of selected time points are plotted separately in panel (C).
