# Supplementary material
Source: PubMed Central journal article supplement (PMC4198049)
Supplement: embj0033-1514-sd2.pdf [file embj0033-1514-sd2.pdf]

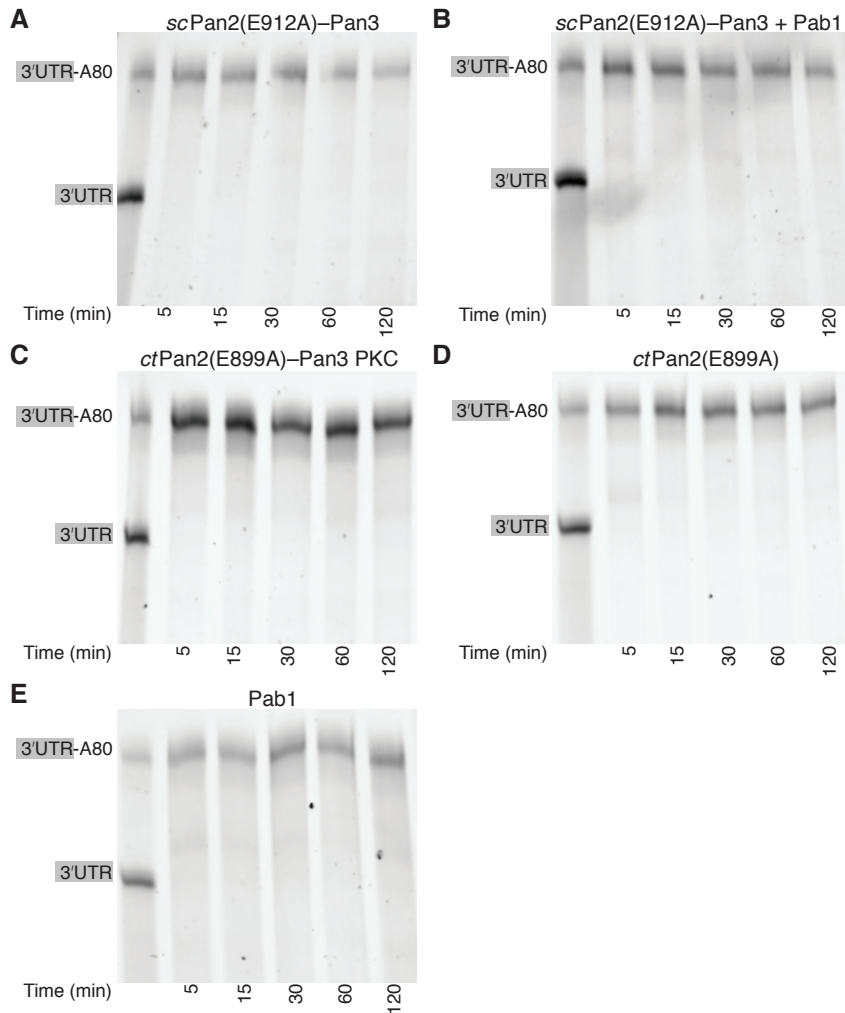

**Supplementary Figure S2: Active site mutants of the Pan2–Pan3 complex are not active in deadenylation assays.**

Deadenylation assays of an RNA substrate (*CYC1* 3' UTR with A<sub>80</sub> tail) by recombinant Pan2–Pan3 from *S. cerevisiae* (*sc*) with an active site mutation in Pan2 (E912A) in the absence (A) and presence (B) of Pab1, Pan2–Pan3 from *C. thermophilum* (*ct*) with an active site mutation in Pan2 (E899A) (C), isolated *ct*Pan2-E899A (D) and isolated *sc*Pab1 (E). Time points were analyzed by denaturing polyacrylamide gel electrophoresis. The first lane of each gel shows *CYC1* 3' UTR with and without A<sub>80</sub> tail as a marker.
