# Supplementary material
Source: PubMed Central journal article supplement (PMC4198049)
Supplement: embj0033-1514-sd4.pdf [file embj0033-1514-sd4.pdf]

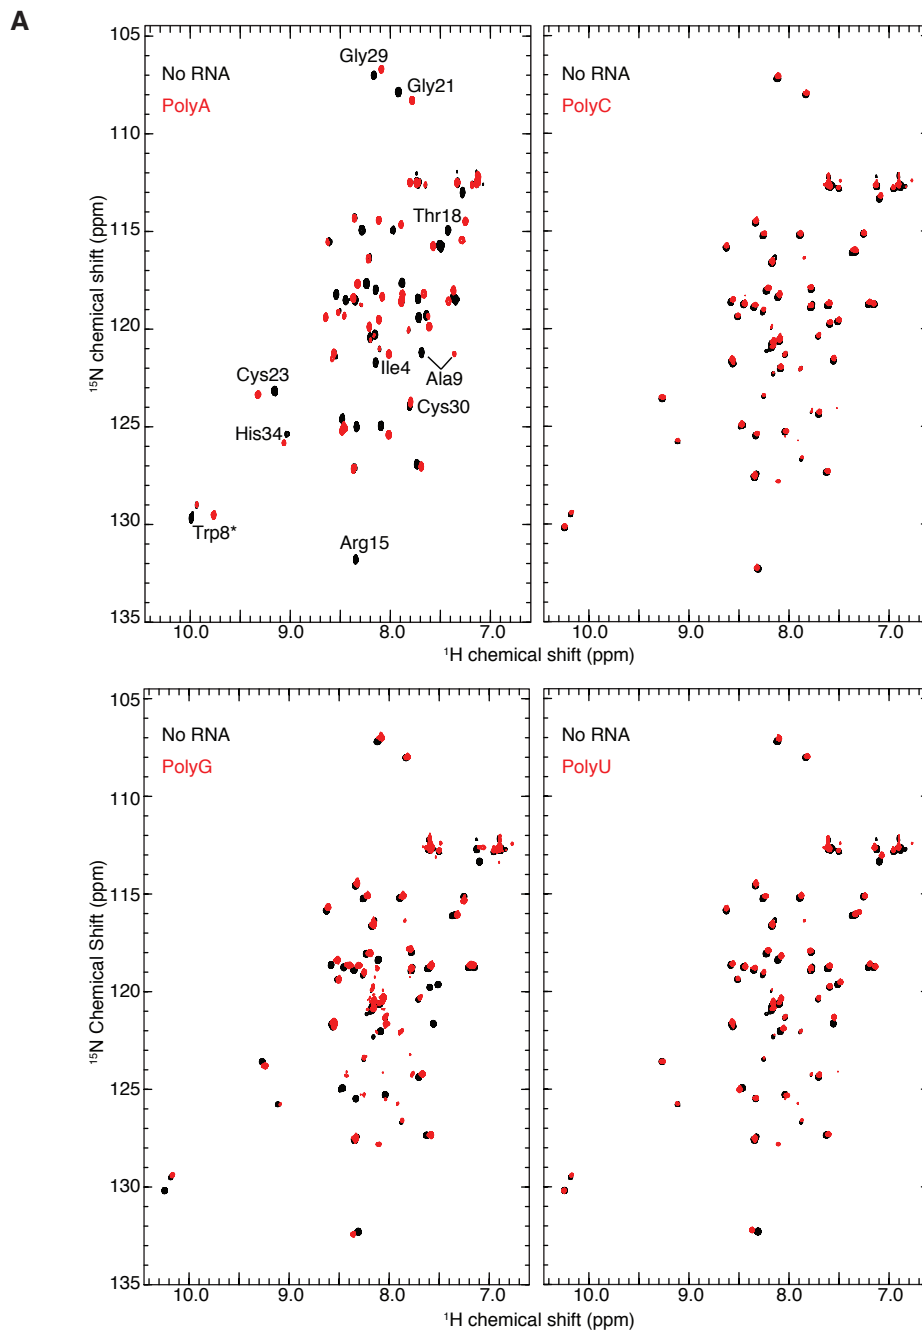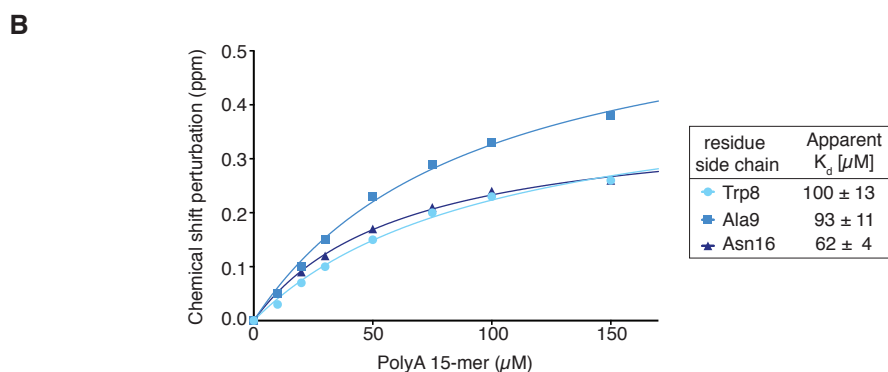

**Supplementary Figure S4: The zinc finger of *scPan3* binds polyA RNA.**

**A**  $^{15}\text{N}$ - $^1\text{H}$  HSQC spectra of  $150 \mu\text{M}$  *scPan3* zinc finger (black), and the same sample containing  $150 \mu\text{M}$  15-mer RNA (red). Selected residues are labeled. Trp8 has two conformations (marked by an asterisk).

**B** Titration of 15-mer polyA RNA to *scPan3* zinc finger. Chemical shift perturbations of Trp8, Ala9 and Asn16 are plotted against RNA concentration. The solid line represents the fit of the data. Apparent  $K_d$  for each residue is indicated ( $\pm$  standard error).
