# Supplementary material
Source: PubMed Central journal article supplement (PMC4198049)
Supplement: embj0033-1514-sd5.pdf [file embj0033-1514-sd5.pdf]

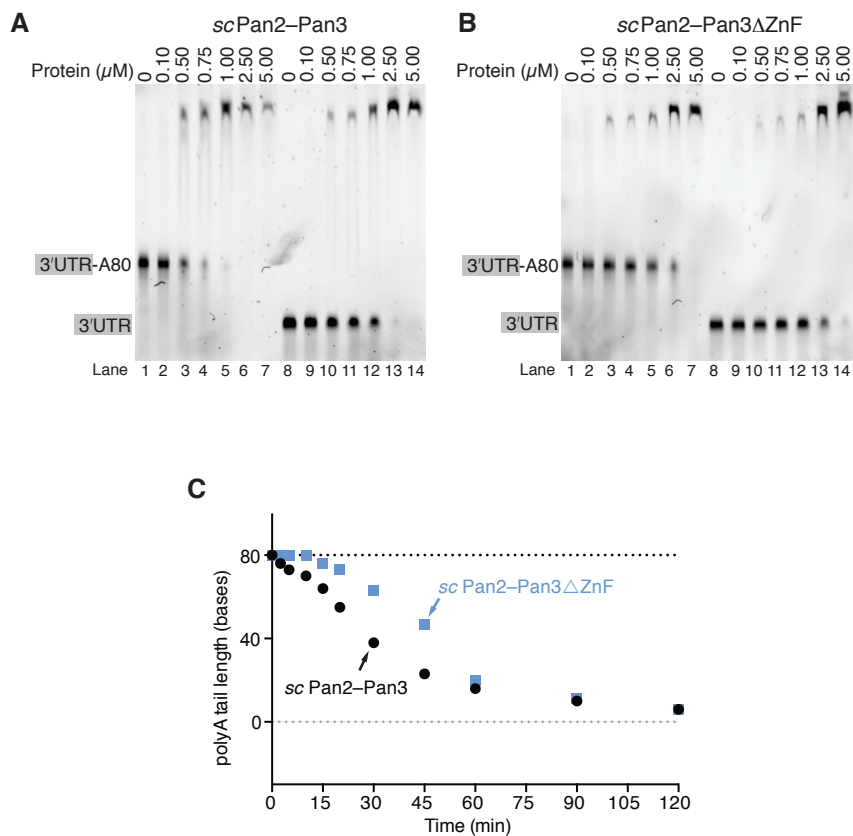

**Supplementary Figure S5: The zinc finger domain of *scPan3* increases the affinity of the Pan2–Pan3 complex to polyA RNA.**

**A-B** Electrophoretic mobility shift assay (EMSA) using the *CYC1* 3' UTR RNA with (lanes 1-7) or without (lanes 8-14) a polyA<sub>80</sub> tail. RNA was incubated with **(A)** *scPan2-Pan3* or **(B)** *scPan2-Pan3* with a deletion of the Pan3 zinc finger (*scPan2-Pan3 $\Delta$ ZnF*). Both complexes contain an active site mutation in *scPan2* (E912A). Binding was analyzed by native polyacrylamide gel electrophoresis.

**C** Deletion of the zinc finger domain results in impaired polyA tail removal. Deadenylation assays using the *CYC1* 3' UTR with polyA<sub>80</sub> tail as substrate with *scPan2-Pan3* (black) and *scPan2-Pan3* with a deletion of the zinc finger (blue). Average polyA tail length is plotted for each time point. Dotted lines indicate the sizes of the *CYC1* 3' UTR RNA with (black) and without (grey) a polyA<sub>80</sub> tail.
