# Supplementary material
Source: PubMed Central journal article supplement (PMC4198049)
Supplement: embj0033-1514-sd7.pdf [file embj0033-1514-sd7.pdf]

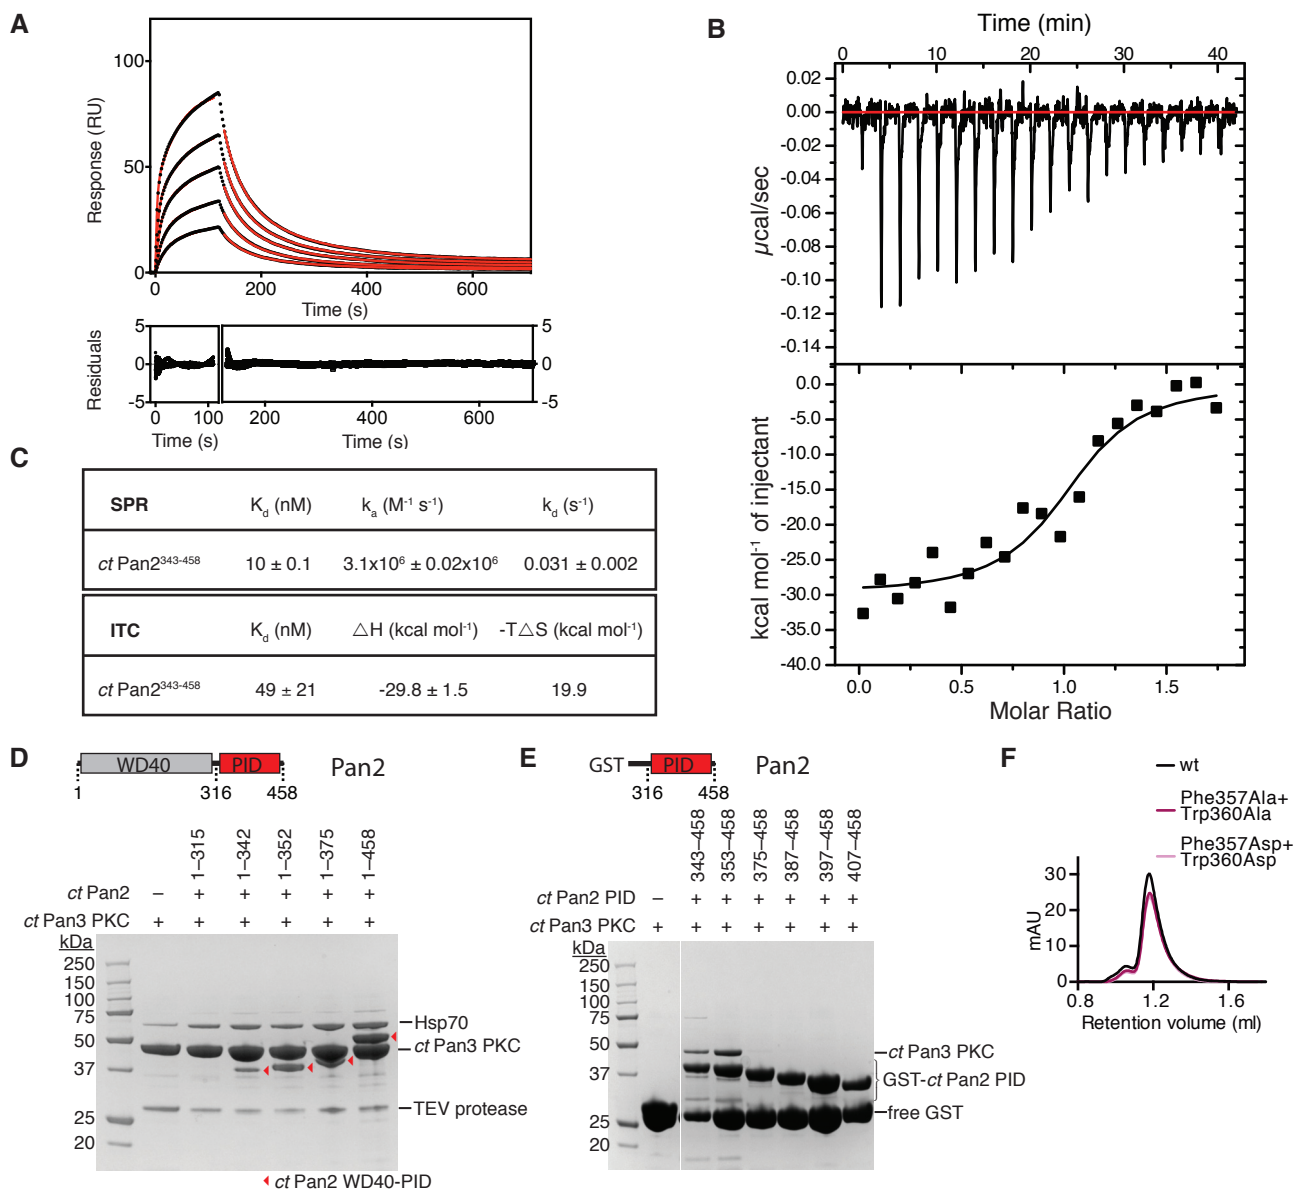

### Supplementary Figure S7: *ctPan2* PID binds to *ctPan3*.

**A** Surface plasmon resonance (SPR) experiment measuring the affinity of the interaction between immobilized GST-*ctPan2*<sup>343-458</sup> and *ctPan3* PKC dimer. GST-*ctPan2* was bound to the chip using an anti-GST antibody and incubated with 5 different concentrations of *ctPan3* PKC dimer. The experiment was performed in triplicate. A representative graph of the fitted data is shown.

**B** Isothermal titration calorimetry (ITC). The excess heat measured during the titration of *ctPan3* PKC dimer into GST-*ctPan2*<sup>343-458</sup> at 25 °C (upper panel) was integrated and plotted against the molar ratios of the two binding partners (lower panel). The solid line represents the fit of the data to a single-site binding model.

**C** Summary of binding data obtained from SPR and ITC experiments. Standard errors are given.

**D** Pull-downs of GST-tagged *ctPan3* PKC co-expressed in *Escherichia coli* with *ctPan2* constructs containing the WD40 and PID regions with sequential C-terminal truncations. Proteins were eluted by cleaving the GST-tag with TEV protease, and then analyzed by SDS-PAGE and Coomassie-blue staining. Bound *ctPan2* WD40-PID is indicated by red arrowheads. The binding analysis indicates that C-terminal truncations into the PID domain weaken Pan2–Pan3 interaction only after removal of all but 27 residues. Removal of the entire linker (1-315) is necessary to prevent the interaction completely. Contaminating Hsp70 and TEV protease are indicated.

**E** GST-tagged *ctPan2* PID domain constructs containing N-terminal truncations were bound to Glutathione Sepharose then incubated with purified *ctPan3* PKC and washed extensively. Bound fractions were analyzed by SDS-PAGE. These pull-downs indicate that removal of at least the first 59 residues of the PID (375-458) is necessary to impair the interaction between Pan2 and Pan3. Even though the lanes are overloaded with GST-*ctPan2* PID, binding to *ctPan3* PKC is not detected for constructs lacking these residues

**F** Mutation of highly-conserved aromatic residues Phe357 and Trp360 that bind pockets in the *ctPan3* PKC dimer (see Fig. 6C) does not disrupt the Pan2–Pan3 interaction. Separately purified *ctPan2* point mutants and *ctPan3* PKC were mixed and binding was analyzed by size exclusion chromatography. Elution profiles measuring  $A_{280\text{ nm}}$  are compared to wild type (wt) *ctPan2*–Pan3 PKC.
