# Supplementary material
Source: PubMed Central journal article supplement (PMC4198049)
Supplement: embj0033-1514-sd8.pdf [file embj0033-1514-sd8.pdf]

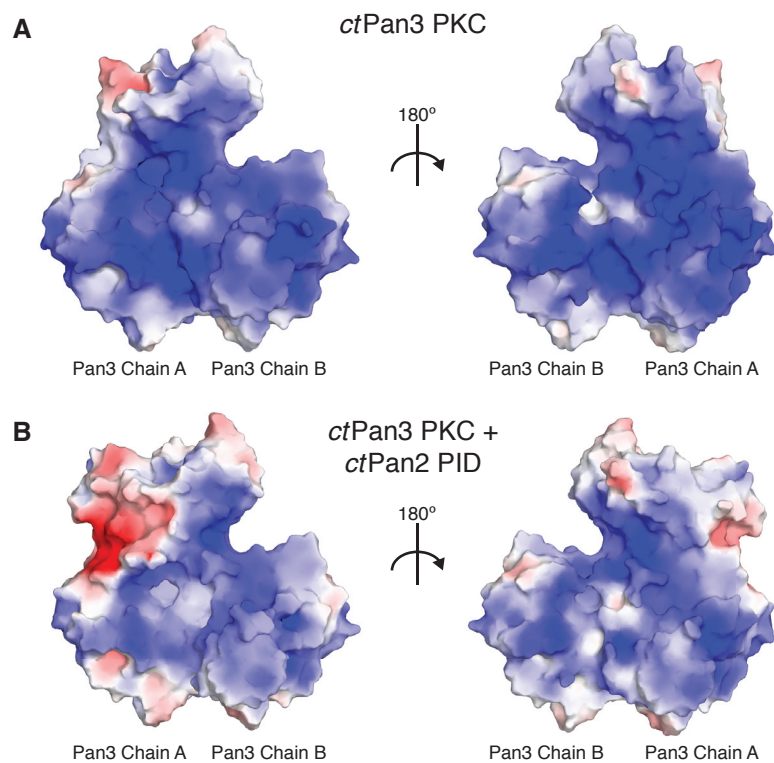

**Supplementary Figure S8: Electrostatic surface potential of the *ctPan2* PID-*ctPan3* PKC complex.**

The solvent-accessible surface of complex is coloured according to the electrostatic potential, ranging from deep blue (positive charge) to red (negative charge) in the range  $\pm 5$  kT/e. The electrostatic potentials were calculated by solving the Poisson–Boltzmann equation with the APBS plugin in PyMOL using the default settings.
