# Supplementary material
Source: PubMed Central journal article supplement (PMC4198049)
Supplement: embj0033-1514-sd9.pdf [file embj0033-1514-sd9.pdf]

**Supplementary Table S1: Summary of conformational constraints and statistics for the 20 accepted NMR structures of the Pan3 zinc finger domain**

**Structural constraints**

---

|                                           |      |
|-------------------------------------------|------|
| Intra-residue                             | 317  |
| Sequential                                | 239  |
| Medium-range ( $2 \leq  i-j  \leq 4$ )    | 230  |
| Long-range ( $ i-j  > 4$ )                | 149  |
| Dihedral angle constraints                | 8    |
| TALOS constraints                         | 62   |
| Distance constraints for 4 hydrogen bonds | 8    |
| Zinc co-ordination constraints            | 10   |
| Total                                     | 1023 |

**Statistics for accepted structures**

---

|                                                         |                                           |
|---------------------------------------------------------|-------------------------------------------|
| Statistics parameter ( $\pm$ SD)                        |                                           |
| RMS deviation for distance constraints                  | $0.0082\text{\AA} \pm 0.0005\text{\AA}$   |
| RMS deviation for dihedral constraints                  | $0.390^\circ \pm 0.021^\circ$             |
| Mean CNS energy term ( $\text{kcal mol}^{-1} \pm$ SD)   |                                           |
| E (overall)                                             | $69.29 \pm 2.12$                          |
| E (van der Waals)                                       | $29.49 \pm 1.34$                          |
| E (distance constraints)                                | $4.81 \pm 0.53$                           |
| E (dihedral and TALOS constraints)                      | $1.30 \pm 0.14$                           |
| RMS deviations from the ideal geometry ( $\pm$ SD)      |                                           |
| Bond lengths                                            | $0.0019 \text{\AA} \pm 0.0005 \text{\AA}$ |
| Bond angles                                             | $0.392^\circ \pm 0.0028^\circ$            |
| Improper angles                                         | $0.250^\circ \pm 0.011^\circ$             |
| Average atomic RMSD from the mean structure ( $\pm$ SD) |                                           |
| Residues 4-35 (N, C $\alpha$ , C atoms)                 | $0.193 \text{\AA} \pm 0.061 \text{\AA}$   |
| Residues 4-35 (all heavy atoms)                         | $0.780 \text{\AA} \pm 0.076 \text{\AA}$   |
