# Supplementary material
Source: PubMed Central journal article supplement (PMC4198049)
Supplement: embj0033-1514-sd10.pdf [file embj0033-1514-sd10.pdf]

**Supplementary Table S2: Pan3 crystallographic data collection and refinement statistics.**

**Data collection statistics**

---

|                                                                      |                                      |
|----------------------------------------------------------------------|--------------------------------------|
| Wavelength (Å)                                                       | 0.9795                               |
| Space group                                                          | <i>P1</i>                            |
| Unit cell parameters: a, b, c (Å); $\alpha$ , $\beta$ , $\gamma$ (°) | 51.5, 146.0, 149.9; 89.8, 81.1, 82.8 |
| Resolution range (outer shell in brackets; Å)                        | 52.21 – 2.42 (2.48 – 2.42)           |
| Unique reflections                                                   | 160,956                              |
| Total observations                                                   | 1,170,731                            |
| $\langle I / \sigma(I) \rangle$ : all (outer shell)                  | 14.3 (2.4)                           |
| $R_{p.i.m.}$ : all (outer shell)                                     | 4.0 (35.9)                           |
| Completeness: all (outer shell) (%)                                  | 98.5 (98.0)                          |
| Multiplicity                                                         | 7.3                                  |
| Wilson B-factor                                                      | 49.1                                 |

**Refinement statistics**

---

|                                                  |                             |
|--------------------------------------------------|-----------------------------|
| Non-hydrogen atoms                               | 27,217                      |
| Metal ions                                       | 8 $\times$ Mg <sup>2+</sup> |
| Ligands                                          | 8 $\times$ ATP              |
| Number of water molecules                        | 984                         |
| Bond length deviation from ideal values (Å)      | 0.004                       |
| Bond angle deviation from ideal values (°)       | 0.875                       |
| Ramachandran favoured/outliers (%)               | 99.1/0.0                    |
| All-atom clashscore                              | 3.28                        |
| Reflections used in refinement                   | 160,878                     |
| Random reflections assigned for cross-validation | 8,073                       |
| $R_{work}/R_{free}$ (%)                          | 19.0/23.4                   |
| Estimate of the coordinate error (Å)             | 0.3                         |
