# Supplementary material
Source: PubMed Central journal article supplement (PMC4198049)
Supplement: embj0033-1514-sd11.pdf [file embj0033-1514-sd11.pdf]

**Supplementary Table S3: Pan3:Pan2 crystallographic data collection and refinement statistics.**

**Data collection statistics**

---

|                                                                      |                                      |
|----------------------------------------------------------------------|--------------------------------------|
| Wavelength (Å)                                                       | 0.9763                               |
| Space group                                                          | $P2_1$                               |
| Unit cell parameters: a, b, c (Å); $\alpha$ , $\beta$ , $\gamma$ (°) | 89.0, 145.3, 101.8; 90.0, 94.8, 90.0 |
| Resolution range (outer shell in brackets; Å)                        | 100.0 – 2.59 (2.68 – 2.59)           |
| Unique reflections                                                   | 80,131                               |
| Total observations                                                   | 525,003                              |
| $\langle I / \sigma(I) \rangle$ : all (outer shell)                  | 12.0 (1.77)                          |
| $R_{p.i.m.}$ : all (outer shell)                                     | 6.0 (66.0)                           |
| Completeness: all (outer shell) (%)                                  | 99.8 (99.7)                          |
| Multiplicity                                                         | 6.5                                  |
| Wilson B-factor                                                      | 62.5                                 |

**Refinement statistics**

---

|                                                  |               |
|--------------------------------------------------|---------------|
| Non-hydrogen atoms                               | 14,282        |
| Metal ions                                       | 4 × $Mg^{2+}$ |
| Ligands                                          | 4 × ATP       |
| Number of water molecules                        | 150           |
| Bond length deviation from ideal values (Å)      | 0.006         |
| Bond angle deviation from ideal values (°)       | 1.146         |
| Ramachandran favoured/outliers (%)               | 99.4/0.0      |
| All-atom clashscore                              | 2.62          |
| Reflections used in refinement                   | 80,119        |
| Random reflections assigned for cross-validation | 4,021         |
| $R_{work}/R_{free}$ (%)                          | 18.3/22.1     |
| Estimate of the coordinate error (Å)             | 0.3           |
